# Supplementary material for: Sustainable treatment for low ammonia nitrogen sewage wastewater in cold climates: natural polymer gel–organic synthetic polymer embedded anammox bacteria immobilized pellets
Source: Royal Society of Chemistry journal article supplement (doi:10.1039/d4ew00538d), 2024-01-01
Supplement: d4ew00538d2.pdf [file d4ew00538d2.pdf]

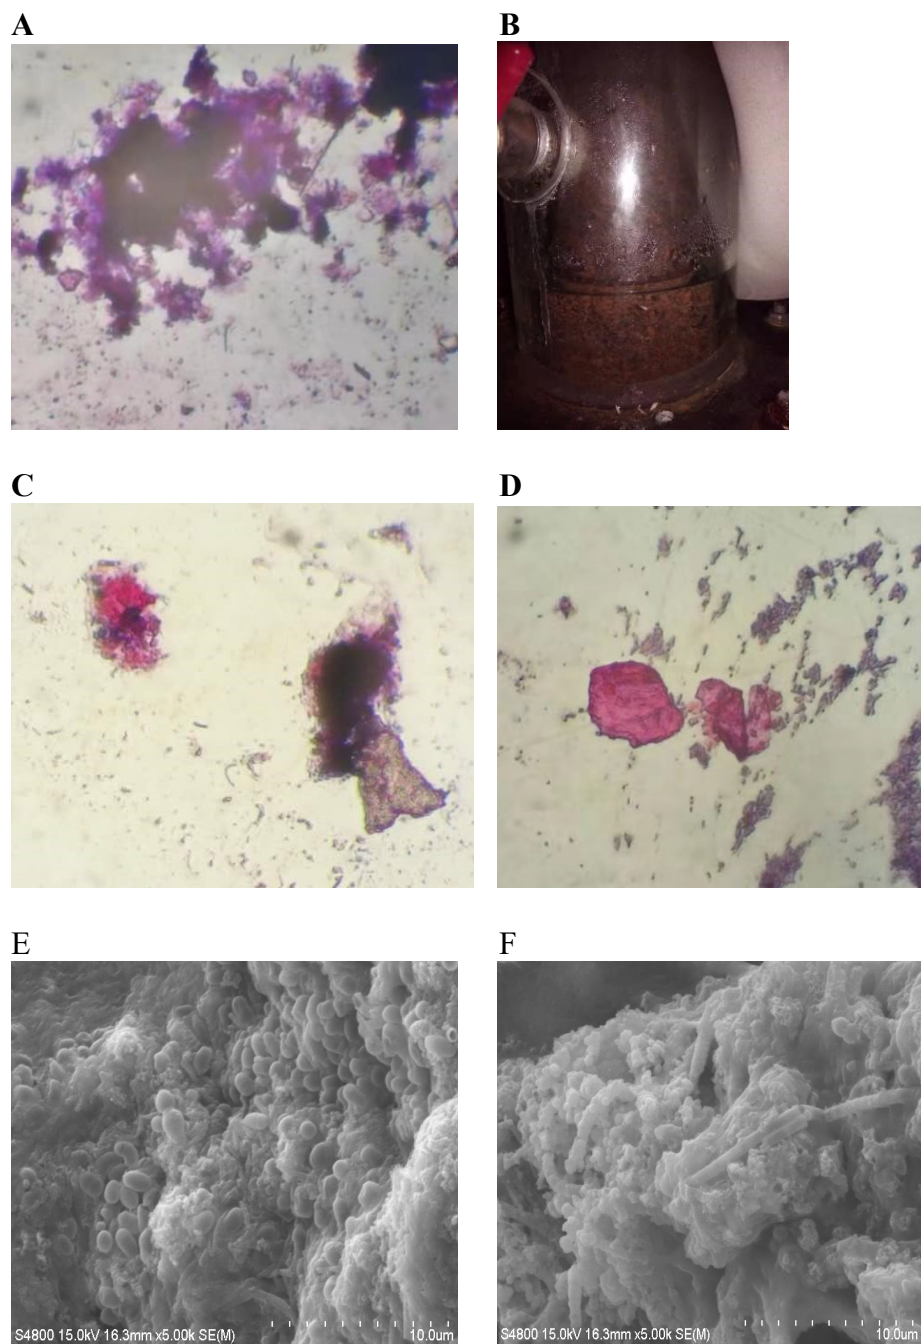

**Fig. SI1** Start-up period: (a) microscopic images of sludge particles after 10 days, (b) color of the sludge in the reactor, (c) microscopic images of sludge particles after 35 days, (d) microscopic images of sludge particles after 90-days, and (e-f) SEM observation of the anammox granular sludge.

**A**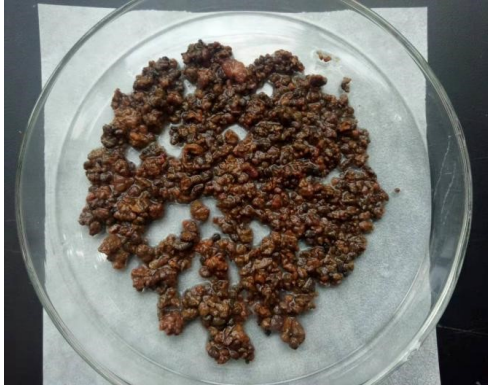**B**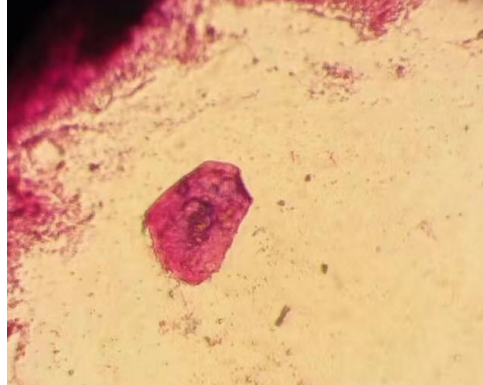**C**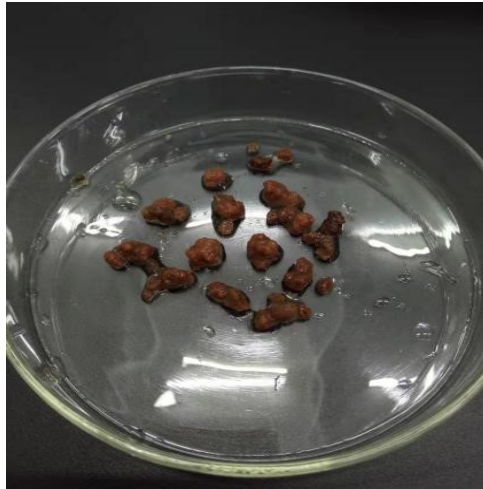

**Fig. SI2.** During the lifting load stage (a) photographic image of granular sludge , (b) microscopic image of anammox sludge, and (c) photographic image of morphological floating granular sludge.

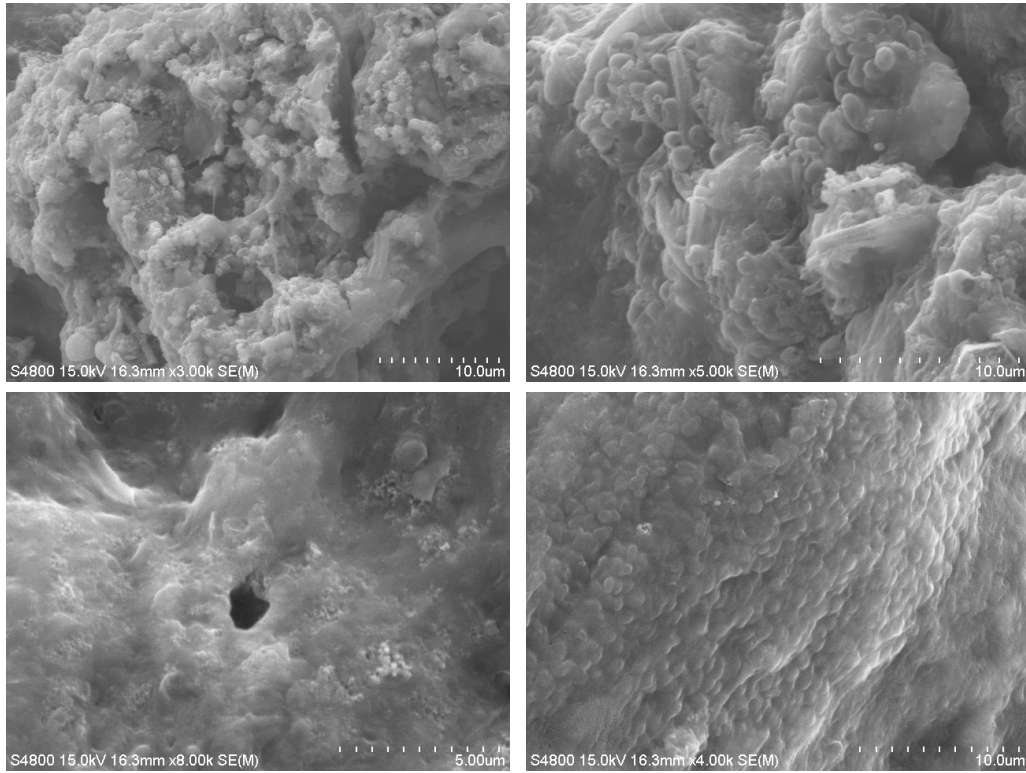

**Fig. S13.** SEM images of floated and precipitated particles.

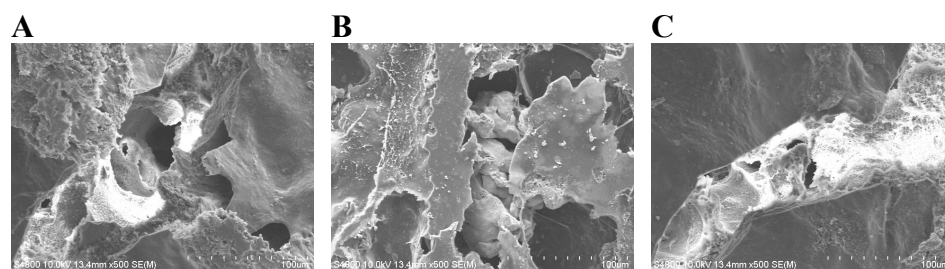

**Fig. SI4.** Scanning electron microscope for (a) PVA, (b) PVA-SA, and (c) PVA-SB gel carriers.

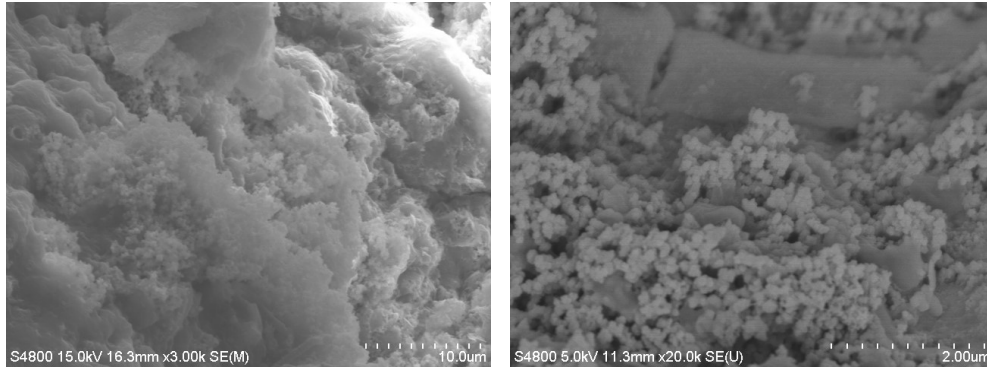

**Fig. S15** Scanning electron microscope (SEM) imaging of mature granular sludge at Temperature 15 °C (left HRT 7h; right HRT 10h).
